## Pharmacokinetics and Plasma Binding of Thiopental. II: Studies at Cesarean Section

Denis J. Morgan, Ph.D.,\* Graeme L. Blackman, Ph.D.,† John D. Paull, M.B.B.S., F.F.A.R.A.C.S.,‡  
Lisette J. Wolf, B.Pharm.§

This study was undertaken to investigate the effect of pregnancy on the disposition of thiopental and to determine the major factors which influence the placental transfer of the drug to the fetus. Maternal venous ( $M_v$ ) and umbilical venous ( $U_v$ ) and arterial ( $U_a$ ) blood samples were collected at delivery from 11 pregnant women at term who received thiopental for induction of anesthesia for elective cesarian section. A detailed study of the pharmacokinetics of thiopental was carried out in 7 of these subjects and blood samples were collected for 80 to 100 hours following thiopental administration. A transient rise in thiopental plasma concentration was observed at delivery. Mean values of pharmacokinetic parameters ( $\pm$ SD) were: initial distribution volume ( $V_1$ ) 17.3 l ( $\pm$ 8.5), apparent volume of distribution ( $V_{d\beta}$ ) 564 l ( $\pm$ 343), volume of distribution at steady state ( $V_{ss}$ ) 288 l ( $\pm$ 180), systemic plasma clearance ( $Cl_p$ ) 0.286 l/min ( $\pm$ 0.156), rate of change of volume of distribution at zero time ( $RV_{d0}$ ) 1.03 l/min ( $\pm$ 0.36) and elimination half-life ( $t_{1/2}$ ) 26.1 h ( $\pm$ 12.6). Comparison of these data with our previously reported data in nonpregnant surgical patients shows that  $V_{d\beta}$ ,  $V_{ss}$ , and  $T_{1/2}$  are significantly greater at cesarian section ( $P < 0.05$ ) and that systemic plasma clearance shows a similar trend.

$U_a$  and  $U_v$  values at delivery were similar within individuals. There was no correlation between the ratio  $U_v/M_v$  at delivery and the dosing-delivery interval ( $\Delta t$ ), or between  $U_v$  and the administered dose or  $\Delta t$ . There were good correlations between  $U_v$  (corrected for dose) and the reciprocals of  $V_1$ ,  $V_{d\beta}$ ,  $V_{ss}$ , and plasma clearance of thiopental. This demonstrates that differences in maternal distribution and elimination characteristics of thiopental may be more important determinants of intersubject differences in fetal drug exposure than differences in dose or  $\Delta t$ . (Key words: Anesthesia: obstetrics. Anesthetics, intravenous: thiopental. Pharmacokinetics. Protein: binding.)

THIOPENTAL is extensively used in obstetrics for induction of anesthesia for cesarian section. The drug is eliminated in humans almost entirely by hepatic

metabolism<sup>1-3</sup> and its hepatic extraction ratio is low in nonpregnant subjects.<sup>4</sup> Hence, its hepatic clearance and elimination half-life will be sensitive to the ability of the liver to metabolize the drug (hepatic intrinsic clearance) but insensitive to changes in liver blood flow.<sup>5</sup> An investigation of the pharmacokinetics of thiopental in pregnant women at cesarean section may yield information on the effect of pregnancy on the hepatic elimination of low-clearance drugs. Studies with several low-clearance anticonvulsant drugs in pregnant subjects led Eadie<sup>6</sup> to suggest that circulating progesterone may cause induction of hepatic drug-metabolizing enzymes in pregnancy.

Factors influencing the transfer across the placenta of thiopental administered to mothers near term have important consequences for the well-being of the fetus and neonate.<sup>7</sup> Past investigations of the placental transfer of thiopental have not fully clarified the relationships among the management of the mother, thiopental pharmacokinetics in the mother, blood concentrations of thiopental in the fetus at birth and neonatal physical status.<sup>8,9</sup> A wide intersubject variation in fetal umbilical blood concentration of thiopental at delivery has been observed which cannot adequately be accounted for by differences in maternal dose of thiopental or in thiopental dosage delivery interval.<sup>8-11</sup> This intersubject variation may be due to a variety of factors, including differences in the pharmacokinetics of thiopental among mothers due to, for example, pregnancy itself or the circulatory effects of vena-caval compression.<sup>12,13</sup>

The aims of our investigations were: 1) to determine the effect of pregnancy on the pharmacokinetics and plasma protein binding of thiopental, using data from our previous publication on thiopental pharmacokinetics in nonpregnant patients undergoing gynecologic surgery for comparison; and 2) to investigate the relationship between maternal pharmacokinetics of thiopental and the placental transfer of the drug.

### Materials and Methods

The placental transfer of thiopental was investigated at delivery in 11 healthy pregnant women who gave birth to healthy infants (patient 13 gave birth to triplets) by elective cesarean section. In-

\* Lecturer, Department of Pharmaceutics, Victorian College of Pharmacy Ltd.

† Senior Lecturer, Department of Pharmaceutical Chemistry, Victorian College of Pharmacy Ltd.

‡ Director of Anaesthetics, The Royal Women's Hospital, Melbourne.

§ Postgraduate Research Student, Department of Pharmaceutical Chemistry, Victorian College of Pharmacy Ltd. Present Address: Nicholas Research Laboratories, Sherbrooke, Victoria.

Received from the Victorian College of Pharmacy Ltd. and the Department of Anaesthetics, The Royal Women's Hospital, Melbourne, Australia. Accepted for publication October 2, 1980. Supported in part by the National Health and Medical Research Council of Australia. Presented at the May 1980 meeting of the Australasian Society of Clinical and Experimental Pharmacologists.

Address reprint requests to Dr. Morgan: Department of Pharmaceutics, Victorian College of Pharmacy LTD, 381 Royal Parade Parkville, Victoria, Australia 3052.

formed consent was given by all patients and the project was approved by the Research Committee of the hospital. The patients received thiopental sodium by bolus (30 s) intravenous injection for induction of anesthesia. Patients were premedicated with scopolamine, and succinylcholine was administered to facilitate tracheal intubation. General anesthesia was maintained with nitrous oxide. The patients were placed on their backs and laterally tilted 10–15 degrees to the left with their arms extended to either side prior to anesthetic induction in an attempt to minimize supine hypotension resulting from caval compression by the gravid uterus. They remained in this position for the duration of anesthesia. The patients involved in the studies also received routine drug therapy as required clinically (*e.g.*, morphine for postoperative analgesia). A detailed investigation of the disposition of thiopental was carried out in 7 of these pregnant subjects (age 20–39 years, mean 30.1 years; weight 53–100 kg, mean 75.1 kg).

The plasma protein binding of thiopental was determined for 10 of the patients in plasma samples collected during the hour following thiopental administration.

The clinical protocol followed was similar to that described previously<sup>4</sup> and involved regular serial blood sample collection for a 3- to 4-day period following intravenous bolus administration of thiopental. More frequent (every few minutes) blood sampling was carried out prior to delivery. At delivery, maternal and fetal umbilical venous and, where possible, fetal umbilical arterial blood samples were obtained.

Thiopental was assayed in plasma by reverse-phase, high-performance liquid chromatography as described previously<sup>4</sup> and plasma protein binding of thiopental was determined by ultrafiltration.<sup>14</sup> Model-independent pharmacokinetic parameters of thiopental were obtained by fitting the plasma concentration-time data of each patient to the appropriate poly-exponential equation by nonlinear least squares regression as described previously.<sup>4</sup> The Mann-Whitney U test was used to evaluate differences between the subject groups. Correlations between variables were investigated by linear regression analysis. A probability value less than 0.05 was considered statistically significant.

## Results

### PLASMA PROTEIN BINDING

The mean ( $\pm$ SD) percentage of thiopental bound to plasma proteins in samples collected during the first hour following thiopental administration was

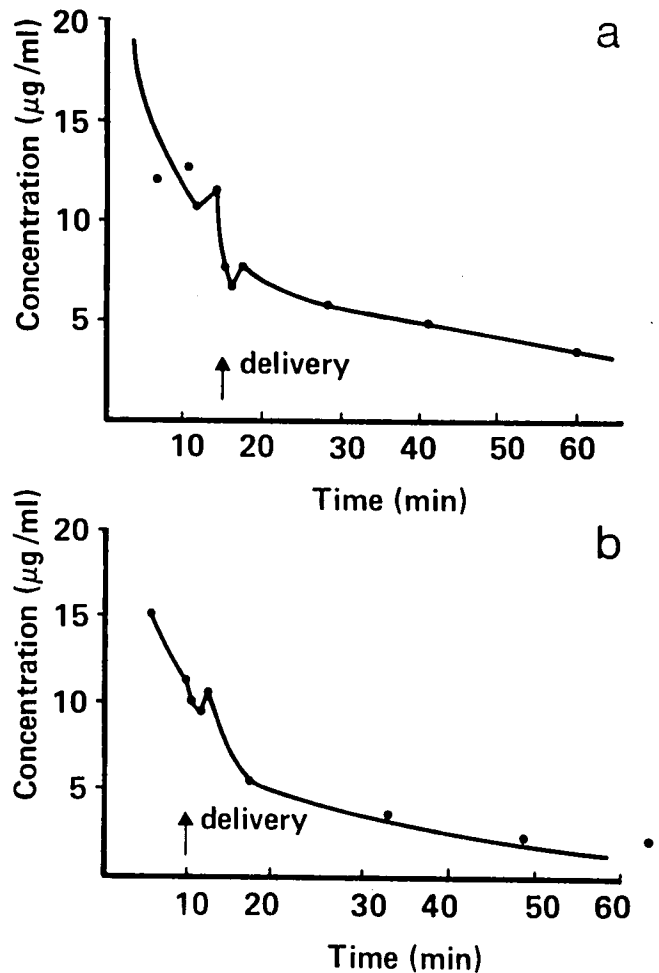

FIG. 1. Typical plasma concentration-time profiles of thiopental in the 1-h period following drug administration in Patient 9 (a) and Patient 12 (b). The times of delivery are indicated by the vertical arrows.

79.8  $\pm$  5.0 per cent for 9 of the patients (concentration range 2–20  $\mu$ g/ml). Percentage bound in the remaining subject (Patient 13) was 58.1 at a concentration of 1.1  $\mu$ g/ml. Apart from this subject who gave birth to triplets, binding was similar to that previously reported by us<sup>4</sup> in healthy volunteers.

### DISPOSITION KINETICS

The data from 2 of the cesarean patients were best fitted by a bi-exponential equation while a tri-exponential equation was appropriate for the other 5 members of this group. The thiopental plasma concentration-time curves of all cesarean patients showed small secondary peaks at around the time of delivery, spanning on average a duration of about 5 min and this is illustrated in figure 1. Computer fitting of the plasma concentration-time data both with and without anomalous data had negligible effect on the

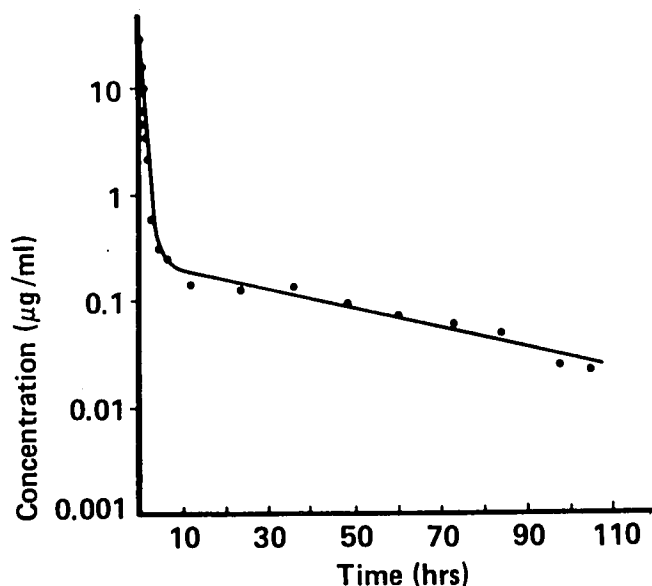

FIG. 2. Plasma concentrations of thiopental in Patient 12 following bolus intravenous administration of 450 mg. The curve was fitted by least-squares regression.

values of the pharmacokinetic parameters. An example of the computer fit is shown in figure 2. The pharmacokinetic parameters calculated for these patients are shown in table 1. There were significant correlations between body weight and  $V_{d\beta}$  ( $r = 0.84$ ,  $P < 0.01$ ), and body weight and  $V_{ss}$  ( $r = 0.73$ ,  $P < 0.05$ ).

#### PLACENTAL TRANSFER

The time between thiopental dosing and delivery ( $\Delta t$ ) and the concentration of thiopental in maternal peripheral venous ( $M_V$ ), umbilical venous ( $U_V$ ) and umbilical arterial plasma ( $U_A$ ) at delivery for the 11 pregnant subjects at cesarian section are summarized in table 2.

There was no correlation between the Apgar score at 1 min or the time to regular respiration and either the umbilical arterial or umbilical venous plasma

concentrations of thiopental at delivery. There was also no correlation between the ratio of umbilical venous/maternal venous plasma thiopental concentration at delivery and the dosing-delivery interval, between the maternal or umbilical venous plasma concentration of thiopental (normalized for dose by dividing by the administered dose in each case) at delivery and the reciprocal of the dose-delivery interval, or between the maternal or umbilical venous plasma concentration of thiopental at delivery and the administered dose.

There was a significant correlation between umbilical venous and arterial plasma concentrations of thiopental at delivery ( $r = 0.98$ ,  $P < 0.001$ ), between maternal and umbilical venous plasma concentrations of thiopental at delivery ( $r = 0.88$ ,  $P < 0.001$ ), and between maternal venous and umbilical arterial plasma concentrations of thiopental at delivery ( $r = 0.89$ ,  $P < 0.01$ ).

In the 7 patients in whom a detailed pharmacokinetic analysis was performed, both the maternal and umbilical venous plasma concentrations of thiopental at delivery (normalized for dose) were correlated significantly with  $1/Cl_p$ ,  $1/V_1$ ,  $1/V_{d\beta}$ ,  $1/V_{ss}$ , and  $1/RV_{d\beta}$  (table 3).

#### Discussion

The plasma protein binding of thiopental in the pregnant patients, measured in plasma collected in the hour following thiopental administration, was similar to that determined previously in healthy volunteer subjects. Thiopental is bound predominantly to albumin in the plasma<sup>15</sup> and during the third trimester of pregnancy, the serum albumin concentration is reduced to approximately 75 per cent of normal.<sup>16</sup> It appears that thiopental binding is not affected by the moderate fall in serum albumin associated with pregnancy.

Following intravenous administration of thiopental for induction of anesthesia for elective cesarean section in 7 healthy pregnant women at term, a small

TABLE 1. Pharmacokinetic Parameters of Thiopental Following Intravenous Administration to Pregnant Patients Undergoing Elective Cesarean Section

|               | Body Weight (kg) | $t_{1/2\beta}$ (h) | $V_1$ (l)      | $V_{d\beta}$ (l) | $V_{ss}$ (l)  | $RV_{d\beta}$ (l/min) | $Cl_p$ (l/min)    |
|---------------|------------------|--------------------|----------------|------------------|---------------|-----------------------|-------------------|
| Patient 6     | 60               | 22.2               | 4.97           | 105              | 60.2          | 0.464                 | 0.055             |
| Patient 7     | 92               | 38.2               | 11.4           | 822              | 265           | 0.965                 | 0.251             |
| Patient 8     | 75               | 6.0                | 22.2           | 287              | 191           | 1.34                  | 0.559             |
| Patient 9     | 74               | 15.1               | 31.7           | 433              | 259           | 0.640                 | 0.335             |
| Patient 10    | 53               | 23.2               | 24.3           | 371              | 245           | 1.24                  | 0.185             |
| Patient 11    | 72               | 45.7               | 12.2           | 752              | 304           | 1.02                  | 0.192             |
| Patient 12    | 100              | 32.3               | 14.3           | 1181             | 690           | 1.54                  | 0.427             |
| Mean $\pm$ SD | 75 $\pm$ 15      | 26.1 $\pm$ 12.6    | 17.3 $\pm$ 8.5 | 564 $\pm$ 343    | 288 $\pm$ 180 | 1.03 $\pm$ 0.36       | 0.286 $\pm$ 0.156 |

TABLE 2. Data on the Placental Transfer of Thiopental after Bolus Intravenous Injection Prior to Elective Cesarean Section

|               | Dose (mg) | Interval between Dosing & Delivery (min) | Plasma Concentration (µg/ml)   |                                 |                                   | U <sub>v</sub> /M <sub>v</sub> | U <sub>a</sub> /U <sub>v</sub> | Apgar | Time to Regular Respiration (min) |
|---------------|-----------|------------------------------------------|--------------------------------|---------------------------------|-----------------------------------|--------------------------------|--------------------------------|-------|-----------------------------------|
|               |           |                                          | Maternal Venous M <sub>v</sub> | Umbilical Venous U <sub>v</sub> | Umbilical Arterial U <sub>a</sub> |                                |                                |       |                                   |
| Patient 6     | 350       | 22.0                                     | 26.0                           | 20.3                            | 22.0                              | 0.78                           | 1.10                           | 8/10  | <1.0                              |
| Patient 7     | 300       | 20.0                                     | 4.4                            | 5.1                             | —                                 | 1.15                           | —                              | 7/9   | 0.5                               |
| Patient 8     | 325       | 11.0                                     | 8.4                            | 7.0                             | 6.0                               | 0.83                           | 0.86                           | 8/10  | 0.0                               |
| Patient 9     | 450       | 15.0                                     | 8.1                            | 12.0                            | —                                 | 1.48                           | —                              | 4/8   | 3.0                               |
| Patient 10    | 350       | 12.0                                     | 6.5                            | 2.9                             | —                                 | 0.45                           | —                              | 9/10  | <1.0                              |
| Patient 11    | 450       | 7.0                                      | 19.4                           | 16.7                            | 14.1                              | 0.86                           | 0.84                           | 9/10  | <1.0                              |
| Patient 12    | 450       | 9.5                                      | 9.9                            | 11.0                            | 10.1                              | 1.11                           | 0.92                           | 8/10  | 1.0                               |
| Patient 13(a) | 400       | 7.8                                      | 22.0                           | 33.9                            | 30.5                              | 1.54                           | 0.90                           | 6/9   | 2.0                               |
| Patient 13(b) | 400       | 8.2                                      | 21.8                           | 23.7                            | 22.5                              | 1.09                           | 0.95                           | 5/8   | 2.0                               |
| Patient 13(c) | 400       | 9.0                                      | 19.6                           | 26.3                            | 22.8                              | 1.34                           | 0.87                           | 4/9   | 2.0                               |
| Patient 14    | 500       | 21.0                                     | 6.5                            | 8.0                             | —                                 | 1.23                           | —                              | 9/10  | 0.5                               |
| Patient 15    | 400       | 11.0                                     | 6.9                            | 5.4                             | 3.6                               | 0.78                           | 0.67                           | 9/10  | 1.0                               |
| Patient 16    | 400       | 9.5                                      | 19.5                           | 27.8                            | 21.3                              | 1.43                           | 0.77                           | 7/10  | 2.0                               |
| Mean          | —         | —                                        | —                              | —                               | —                                 | 1.08                           | 0.87                           | —     | —                                 |

secondary peak was observed in the thiopental plasma concentration-time curves of all subjects at around the time of delivery. This phenomenon was not observed in our previous study of nonpregnant women undergoing gynecologic surgery,<sup>4</sup> although the frequency of blood sampling in the pregnant group was much higher around the time of delivery than during surgery in the nonpregnant group. The manipulations involved in removing the fetus from the uterus, with the accompanying fluctuations in the pressure exerted on maternal blood vessels and disruption to normal blood flow in the area, may have given rise to the secondary peaks observed. Moore and McBride<sup>17</sup> observed secondary peaks in the plasma concentration time curve of diazepam administered to pregnant women during labour. However, the rise in diazepam concentrations occurred during the 18-hour period after parturition and was of a greater magnitude than that observed by us with thiopental. Moore and McBride<sup>17</sup> concluded that the phenomenon with diazepam was probably due to changes in physiology related to posture and exercise as their patients first became ambulant after delivery.

TABLE 3. Correlations Between Maternal and Umbilical Venous Thiopental Concentrations at Delivery Normalized for Dose and Pharmacokinetic Parameters (n = 7)

| Parameter          | M <sub>v</sub> /Dose |        | U <sub>v</sub> /Dose |        |
|--------------------|----------------------|--------|----------------------|--------|
|                    | r                    | P      | r                    | P      |
| 1/V <sub>1</sub>   | 0.88                 | <0.005 | 0.84                 | <0.01  |
| 1/V <sub>dβ</sub>  | 0.84                 | <0.01  | 0.73                 | <0.05  |
| 1/V <sub>ss</sub>  | 0.87                 | <0.01  | 0.78                 | <0.025 |
| 1/RV <sub>d0</sub> | 0.71                 | <0.05  | 0.78                 | <0.025 |
| 1/Cl <sub>p</sub>  | 0.90                 | <0.005 | 0.80                 | <0.025 |

One of the aims of this study was to investigate the effects of pregnancy on the pharmacokinetics of thiopental. Table 4 provides a comparison of the data obtained in pregnant patients in this investigation with our previously reported data obtained in nonpregnant patients undergoing gynecologic surgery.<sup>4</sup>

The greatest difference observed between the pharmacokinetic parameters of the pregnant and nonpregnant groups was in the elimination half-life (T<sub>1/2β</sub>). The mean half-life obtained in the nonpregnant group was 11.5 hours compared with 26.1 hours in the pregnant group. The range of values observed in the pregnant group (6.0–45.7 hours) was much wider than that observed in the nonpregnant group (9.7–12.7 hours). The longer elimination half-life in the pregnant group is due to a larger volume of distribution of the drug rather than a lower clearance. In fact, the clearance of thiopental was greater in the pregnant group. The elimination half-lives of several other low clearance, extensively metabolized drugs administered to pregnant women either during labor or prior to cesarian section have been reported. No change in half-life was observed with lorazepam<sup>18</sup>

TABLE 4. Comparison of the Pharmacokinetics of Thiopental Between Pregnant Women at Cesarean Section and Nonpregnant Patients Undergoing Gynecologic Surgery (Mean ± SD)

| Parameter                | Nonpregnant   | Pregnant      | P      |
|--------------------------|---------------|---------------|--------|
| Age (yr)                 | 40.6 ± 15.7   | 30.1 ± 7.1    | N.S.*  |
| Weight (kg)              | 59.8 ± 8.4    | 75.1 ± 15.3   | <0.1   |
| V <sub>1</sub> (l)       | 13.8 ± 9.4    | 17.1 ± 8.5    | N.S.   |
| RV <sub>d0</sub> (l/min) | 0.73 ± 0.36   | 1.03 ± 0.36   | N.S.   |
| V <sub>dβ</sub> (l)      | 233 ± 98      | 564 ± 343     | <0.05  |
| V <sub>ss</sub> (l)      | 97.5 ± 40     | 288 ± 180     | <0.05  |
| Cl <sub>p</sub> (l/min)  | 0.150 ± 0.063 | 0.286 ± 0.156 | <0.1   |
| T <sub>1/2β</sub> (h)    | 11.5 ± 1.0    | 26.1 ± 12.6   | <0.025 |

\* Not significant.

or amobarbital.<sup>19</sup> Longer half-lives were observed in pregnancy for nordiazepam<sup>18</sup> and diazepam<sup>17</sup> due in both instances to a larger volume of distribution. However, the elimination half-lives of both pancuronium<sup>20</sup> and oxazepam<sup>21</sup> were found to be shorter in pregnancy; in the case of pancuronium, this was due to a higher clearance of the drug. This inter-drug variation in the effect of pregnancy on the elimination half-life appears to result (for the drugs cited above) from the variation in the net effect of two opposing tendencies: the tendency of the half-life to increase because of the higher volume of distribution in pregnancy, and the tendency of the half-life to decrease due to the higher drug clearance in pregnancy. In the case of clorazepate,<sup>18</sup> both volume of distribution and clearance were higher in pregnant subjects but elimination half-life was not significantly different from nonpregnant values.

The initial volume of distribution ( $V_1$ ) and the initial rate of change of volume of distribution ( $RV_{d0}$ ) of thiopental were similar in both pregnant and nonpregnant subjects, although there was nearly a tenfold intersubject variation in the values of the initial volume of distribution. These results suggest that for a given dose, initial plasma concentrations and initial rate of drug distribution are similar in both groups of subjects. The higher apparent volume of distribution of thiopental in the pregnant subjects may be partly due to the changes in hemodynamics resulting from pregnancy<sup>22</sup> and the delivery and also to the higher body weight of the pregnant subjects. It should be pointed out though that apparent volume of distribution of thiopental only correlated with body weight within the pregnant group. This contrasts with the findings of our earlier study<sup>4</sup> where no correlation was found between any of the pharmacokinetic parameters and body weight and may be a result of the small sample sizes studied.

There was a trend to a higher total systemic plasma clearance in the pregnant subjects although the data, particularly of the pregnant group, were highly variable (range 0.055–0.559 l/min). Plasma clearance values were not corrected for body weight because there was no correlation between these two variables either within each group or in all twelve patients. The trend in pregnant subjects to a higher clearance of thiopental, a low clearance drug, is consistent with other reports<sup>6,23–25</sup> which suggest that in pregnancy, hepatic drug-metabolizing enzymes are in an induced state, particularly near term, and for several weeks postpartum.

It is not possible to determine to what extent the changes observed in the pharmacokinetic parameters of the pregnant subjects were due solely to

pregnancy. As pointed out by Philipson,<sup>26</sup> data obtained from studies in pregnant women during cesarean section may not be representative for any stage of pregnancy except precisely cesarean section. In the present study, the data from the pregnant group were compared with data from nonpregnant women undergoing gynecologic surgery, in an attempt to take into account the effects of surgery on pharmacokinetics in the pregnant group. Another potential limitation on the data obtained from the pregnant patients at cesarean section is that delivery took place within about 20 min of thiopental administration, therefore for the majority of the study period the subjects were not pregnant. However, previous reports showing evidence in pregnancy of altered drug clearance<sup>25</sup> and of induction of hepatic microsomal enzymes,<sup>28</sup> demonstrated that the values for these parameters do not begin to return to nonpregnant levels until after the first week postpartum.

The lack of a correlation between the Apgar score at delivery and either the umbilical venous or arterial plasma concentrations of thiopental probably reflects the imprecision of this method of assessment of the effect of placentally transferred thiopental on neonatal physical status rather than the lack of an effect. The more precise neurobehavioral tests of Scanlon have demonstrated that maternally-administered thiopental has a broad-spectrum, nonspecific neurobehavioral depressant effect on the newborn.<sup>7</sup>

In the present study the mean  $U_w/M_v$  ratio obtained was approximately equal to one and there was no correlation found between the ratio  $U_w/M_v$  and either the dosing-delivery interval or the reciprocal of the dosing-delivery interval. The data indicate that transfer of thiopental across the placenta is rapid and this is consistent with findings from several earlier studies.<sup>8,10,11,27</sup> The mean value at delivery of the ratio  $U_A/U_V$  was 0.87 which indicates that, over the range of thiopental dosing-delivery intervals encountered (8–22 min), the drug distribution process throughout the fetus was nearing completion. This is consistent with the trend observed by Schepens and Heyndrickx<sup>9</sup> who reported a mean  $U_A/U_V$  ratio at delivery of 0.46 corresponding to thiopental dosing-delivery intervals in the range 4–7 min. These data suggest that equilibration of thiopental in the fetus is a relatively rapid process, and that in pharmacokinetic terms, for thiopental, the fetus may be viewed as a rapidly-equilibrating or shallow compartment.<sup>28</sup>

Several explanations have been proposed to explain the widely recognized phenomenon of an alert infant being born of a mother anesthetized with thiopental. These include the presence of an "adapt-

ability response" of the infant to birth,<sup>27</sup> preferential uptake of thiopental by the fetal liver,<sup>8,29</sup> the higher relative water content of fetal brain,<sup>27</sup> the fall in  $P_{CO_2}$  at delivery,<sup>27</sup> and rapid redistribution of the drug into maternal tissues<sup>9,11</sup> causing a rapid reduction in the maternal-to-fetal concentration gradient. Any of the latter four factors might be expected to prevent thiopental from achieving sufficiently high concentrations in the fetal brain to cause depression. The results from the present study indicate that the rapid redistribution of thiopental in the maternal tissues occurring in the interval between dosing and delivery, is the major factor responsible for the discrepancy in the states of consciousness of the mother and neonate at delivery confirming results of earlier studies.<sup>9,30</sup> In the present study, venous plasma concentrations of thiopental in the umbilical cord, which would be similar to those entering the fetal brain, were well below arterial plasma concentrations of thiopental which have been reported necessary to produce anesthesia in adults (39–42  $\mu\text{g/ml}$ ).<sup>31</sup>

One of the major aims of this investigation was to identify the factors responsible for the large intersubject variation in the placental transfer of thiopental, as indicated by the umbilical venous concentration of the drug at delivery. Previous studies have demonstrated that the length of the thiopental dosing-delivery interval does not correlate with the umbilical blood concentration of thiopental at delivery<sup>8</sup> or with the condition of the newborn.<sup>10,32</sup> Furthermore, the protein binding of thiopental has been reported to be similar in maternal and fetal plasma,<sup>8</sup> therefore intersubject differences in umbilical blood concentrations of thiopental are presumably not due to differences between maternal and fetal plasma protein binding of thiopental. In the present study, the intersubject differences in the umbilical venous plasma concentrations of thiopental at delivery were not correlated with intersubject differences in the dose of thiopental administered nor with the dosing-delivery interval. However, at delivery, both maternal and umbilical venous plasma concentrations of thiopental normalized for dose correlated well with the reciprocal of volume of distribution and of systemic plasma clearance of thiopental. The plasma concentrations were normalized for the administered dose because linear pharmacokinetics apply for thiopental and therefore, plasma concentration of the drug at a given time is directly proportional to the administered dose. It appears, therefore, that intersubject differences of maternal distribution and elimination characteristics of thiopental may be more important determinants of intersubject differences of fetal drug exposure

than differences of dose or of dosing-delivery interval. This is consistent with the fact that both volume of distribution and systemic plasma clearance of thiopental varied approximately tenfold among patients, whereas the dosing-delivery interval varied only about threefold and the dose administered less than twofold. The reason for the large intersubject variability in pharmacokinetic parameters of thiopental in the cesarean section patients may be related to the effect of caval compression by the gravid uterus during surgery. However, alterations in hemodynamics would not be expected to greatly affect the elimination of thiopental because hepatic clearance of this low clearance drug will be independent of changes in liver blood flow.<sup>5</sup> In our previous report,<sup>4</sup> in which the pharmacokinetics of thiopental were investigated in nonpregnant patients during gynecological surgery, there was only about a threefold variation of pharmacokinetic parameters observed among patients and therefore the large variability in the cesarean group is presumably not due to the surgery itself. An attempt was made to eliminate caval compression in the cesarian group by using a left lateral tilt, however, this may have been unsuccessful. Further studies of the placental transfer of thiopental need to be carried out in the absence of caval compression.

The authors are indebted to Dr. Kenneth Raymond for assistance with the pharmacokinetic data analysis. L. J. Wolf was a recipient of a Cyril J. Tonkin Fellowship, May and Baker Australia Pty Ltd kindly supplied us with thiopental sodium.

### References

1. Brodie BB, Mark LC, Papper EM, et al: The fate of thiopental in man and a method for its estimation in biological material. *J Pharmacol Exp Ther* 98:85–96, 1950
2. Shideman FE: *In vitro* metabolism of barbiturates. *Fed Proc* 11:640–646, 1952
3. Mark LC, Brand L, Kamvyssi S, et al: Thiopental metabolism by human liver *in vivo* and *in vitro*. *Nature* 206:1117–1119, 1965
4. Morgan DJ, Blackman GL, Paull D, et al: Pharmacokinetics and plasma binding of thiopental. I: Studies in surgical patients. *Anesthesiology* 54:468–473, 1981
5. Wilkinson GR, Shand DG: A physiological approach to hepatic drug clearance. *Clin Pharmacol Ther* 18:377–390, 1975
6. Eadie MJ, Lander CM, Tyrer JH: Plasma drug level monitoring in pregnancy. *Clin Pharmacokinet* 2:427–436, 1977
7. Hodgkinson R, Marx GF, Kim SS: Neonatal neurobehavioral tests following vaginal delivery under ketamine, thiopental and extradural anesthesia. *Anesth Analg (Cleve)* 56:548–553, 1977
8. Finster M, Mark LC, Morishima HO, et al: Plasma thiopental concentration in the newborn following delivery under thiopental-nitrous oxide anesthesia. *Am J Obstet Gynecol* 95:621–629, 1966
9. Schepens P, Heyndrickx A: Placental transfer of thiopental. *Eur J Toxicol* 8:87–93, 1975
10. Crawford JS, Kane PO: Some aspects of obstetric anaesthesia.

- Part I: The use of thiopentone sodium. *Br J Anaesth* 28: 146-154, 1956
11. McKechnie FB, Converse JG: Placental transmission of thiopental. *Am J Obstet Gynecol* 70:639-644, 1955
  12. Kerr MG, Scott DB, Samuel E: Studies of the inferior vena-cava in pregnancy. *Br Med J* 1:532-533, 1964
  13. Lees MM, Taylor SH, Scott DB, et al: A study of cardiac output at rest throughout pregnancy. *Br J Obstet Gynecol* 74:319-328, 1967
  14. Thomas J, Long G, Moore G, et al: Plasma protein binding and placental transfer of bupivacaine in humans. *Clin Pharmacol Ther* 19:426-434, 1976
  15. Becker KE, Jr: Gas chromatographic assay for free and total plasma levels of thiopental. *ANESTHESIOLOGY* 45:656-660, 1976
  16. Song CS, Merkatz IR, Rifkind AB: The influence of pregnancy and oral contraceptive steroids on the concentration of plasma proteins. *Am J Obstet Gynecol* 108:227-231, 1970
  17. Moore RG, McBride WG: The disposition kinetics of diazepam in pregnant women at parturition. *Eur J Clin Pharmacol* 13:275-284, 1978
  18. Rey E, d'Athis Ph, Giraux P, et al: Pharmacokinetics of clorazepate in pregnant and nonpregnant women. *Eur J Clin Pharmacol* 15:175-180, 1979
  19. Krauer B, Draffan GH, Williams FM: Elimination kinetics of amobarbital in mothers and their newborn infants. *Clin Pharmacol Ther* 14:442-447, 1973
  20. Duvaldestin P, Demetriou M, Henzel D, et al: The placental transfer of pancuronium and its pharmacokinetics during cesarian section. *Acta Anaesthesiol Scand* 22:327-333, 1978
  21. Tomson G, Lunell NO, Sundwall A, et al: Placental passage of oxazepam and its metabolism in mother and newborn. *Clin Pharmacol Ther* 25:74-81, 1979
  22. Assali NS, Brinkman CR: Pathophysiology of gestation. Vol I: Maternal disorders. New York, Academic Press, 1972
  23. Davis M, Simmons CJ, Dordoni B, et al: Induction of hepatic enzymes during normal human pregnancy. *Br J Obstet Gynaecol* 80:690-694, 1973
  24. Perez V, Gorodisch S, Casavilla F, et al: Ultrastructure of human liver at the end of normal pregnancy. *Am J Obstet Gynecol* 110:428-431, 1971
  25. Dam M, Christiansen J, Munck O, et al: Antiepileptic drugs: metabolism in pregnancy. *Clin Pharmacokinet* 4:53-62, 1979
  26. Philipson A: Pharmacokinetics of antibiotics in pregnancy and labor. *Clin Pharmacokinet* 4:297-309, 1979
  27. Flowers CE, Jr: The placental transmission of barbiturates and thiobarbiturates and their pharmacological action on the mother and the infant. *Am J Obstet Gynecol* 78: 730-740, 1959
  28. Levy G, Hayton WL: Pharmacokinetic aspects of placental drug transfer, *Fetal Pharmacology*, Edited by Boreus L. New York, Raven Press, 1973, pp 29-39
  29. Finster M, Morishima HO, Mark LC, et al: Tissue thiopental concentrations in the fetus and newborn. *ANESTHESIOLOGY* 36:155-158, 1972
  30. Flowers CE, Jr: Factors related to the placental transfer of thiopental in the hemochorial placenta. *Am J Obstet Gynecol* 85:646-658, 1963
  31. Becker KE, Jr: Plasma levels of thiopental necessary for anesthesia. *ANESTHESIOLOGY* 49:192-196, 1978
  32. Cohen EN, Paulson WJ, Wall J, et al: Thiopental, curare, and nitrous oxide anesthesia for cesarian section with studies on placental transmission. *Surg Gynecol Obstet* 97:456-462, 1953
